# Supplementary material
Source: publisher site journal article supplement (https://www.dovepress.com/article/307305)

Figure S1. Principal-component analysis shows high consistency of the RNA-Seq data sets for each organ and each time point in CLP-induced polymicrobial sepsis.

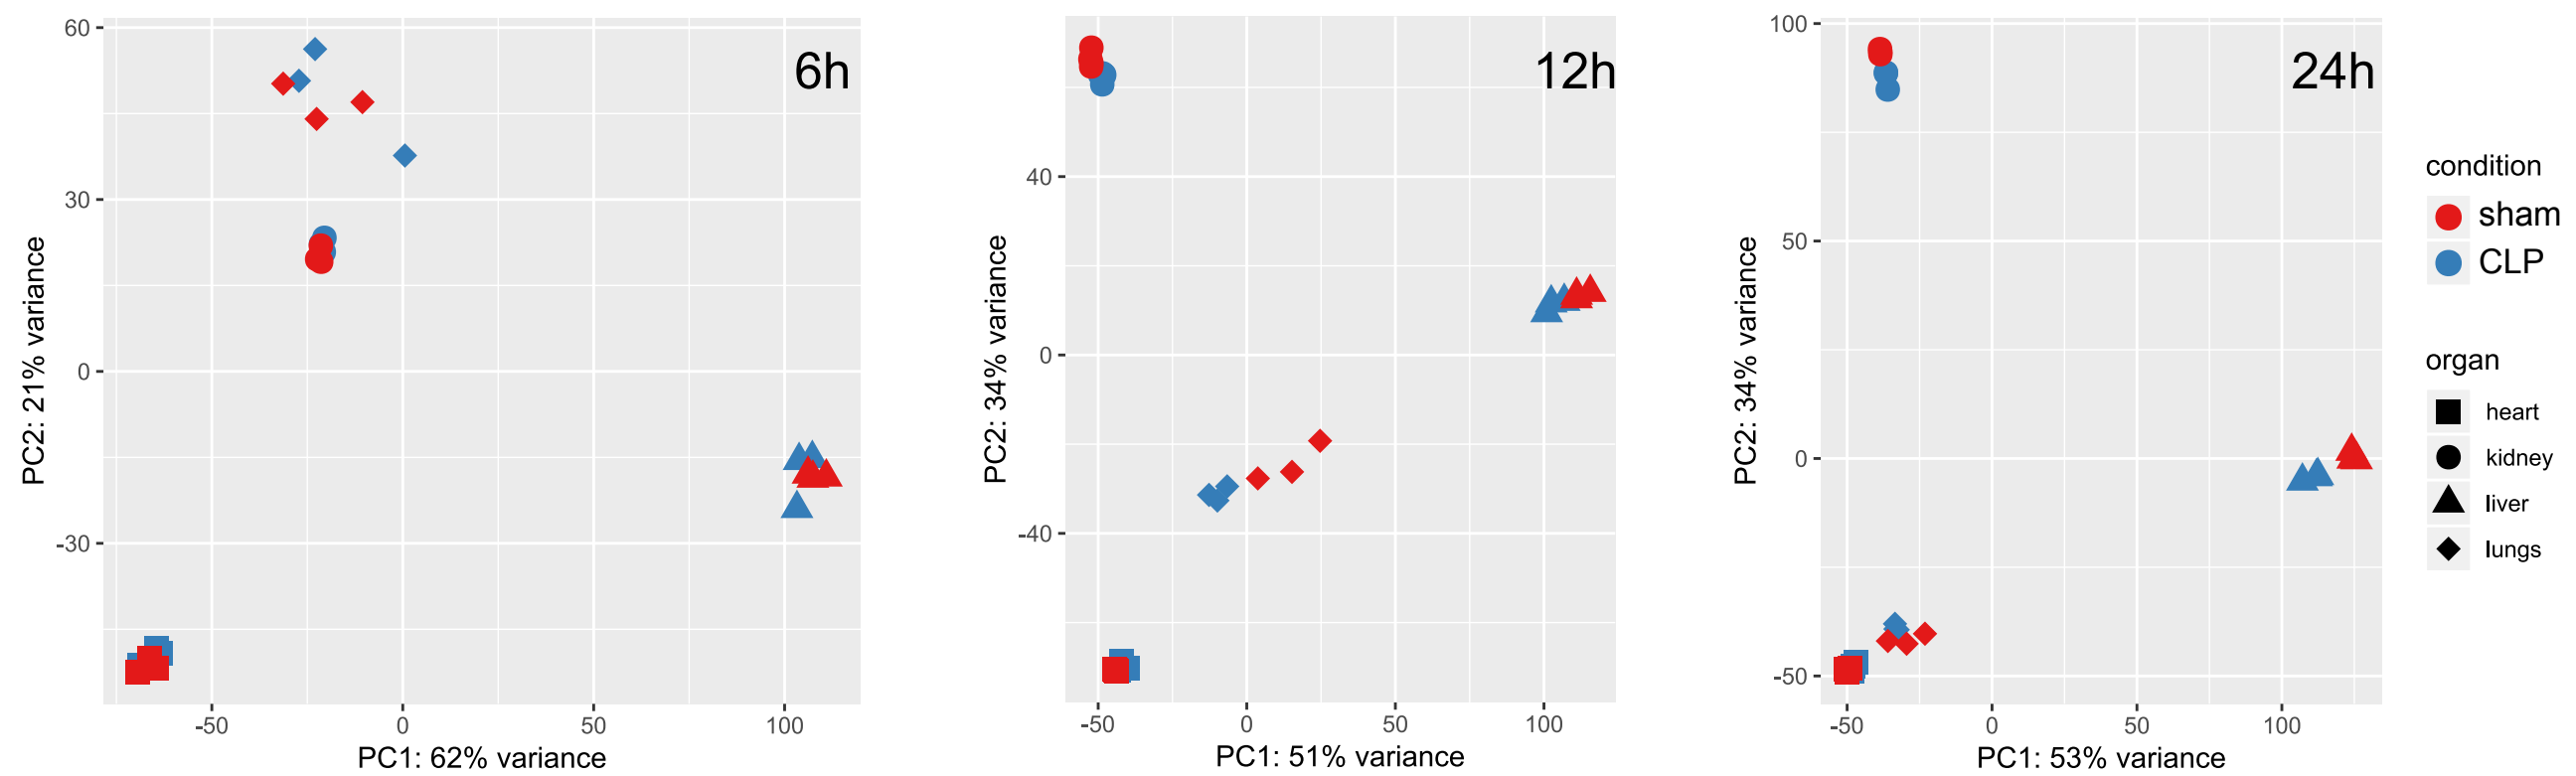

Supplement: Supplementary file 1 [file 16_Apr_2021_307305_Revised_Supplementary_Figure_S1_V2.pdf › 16_Apr_2021_307305_Revised_Supplementary_Figure_S1_V2.pdf]
